# Supplementary material
Source: PubMed Central journal article supplement (PMC3340581)

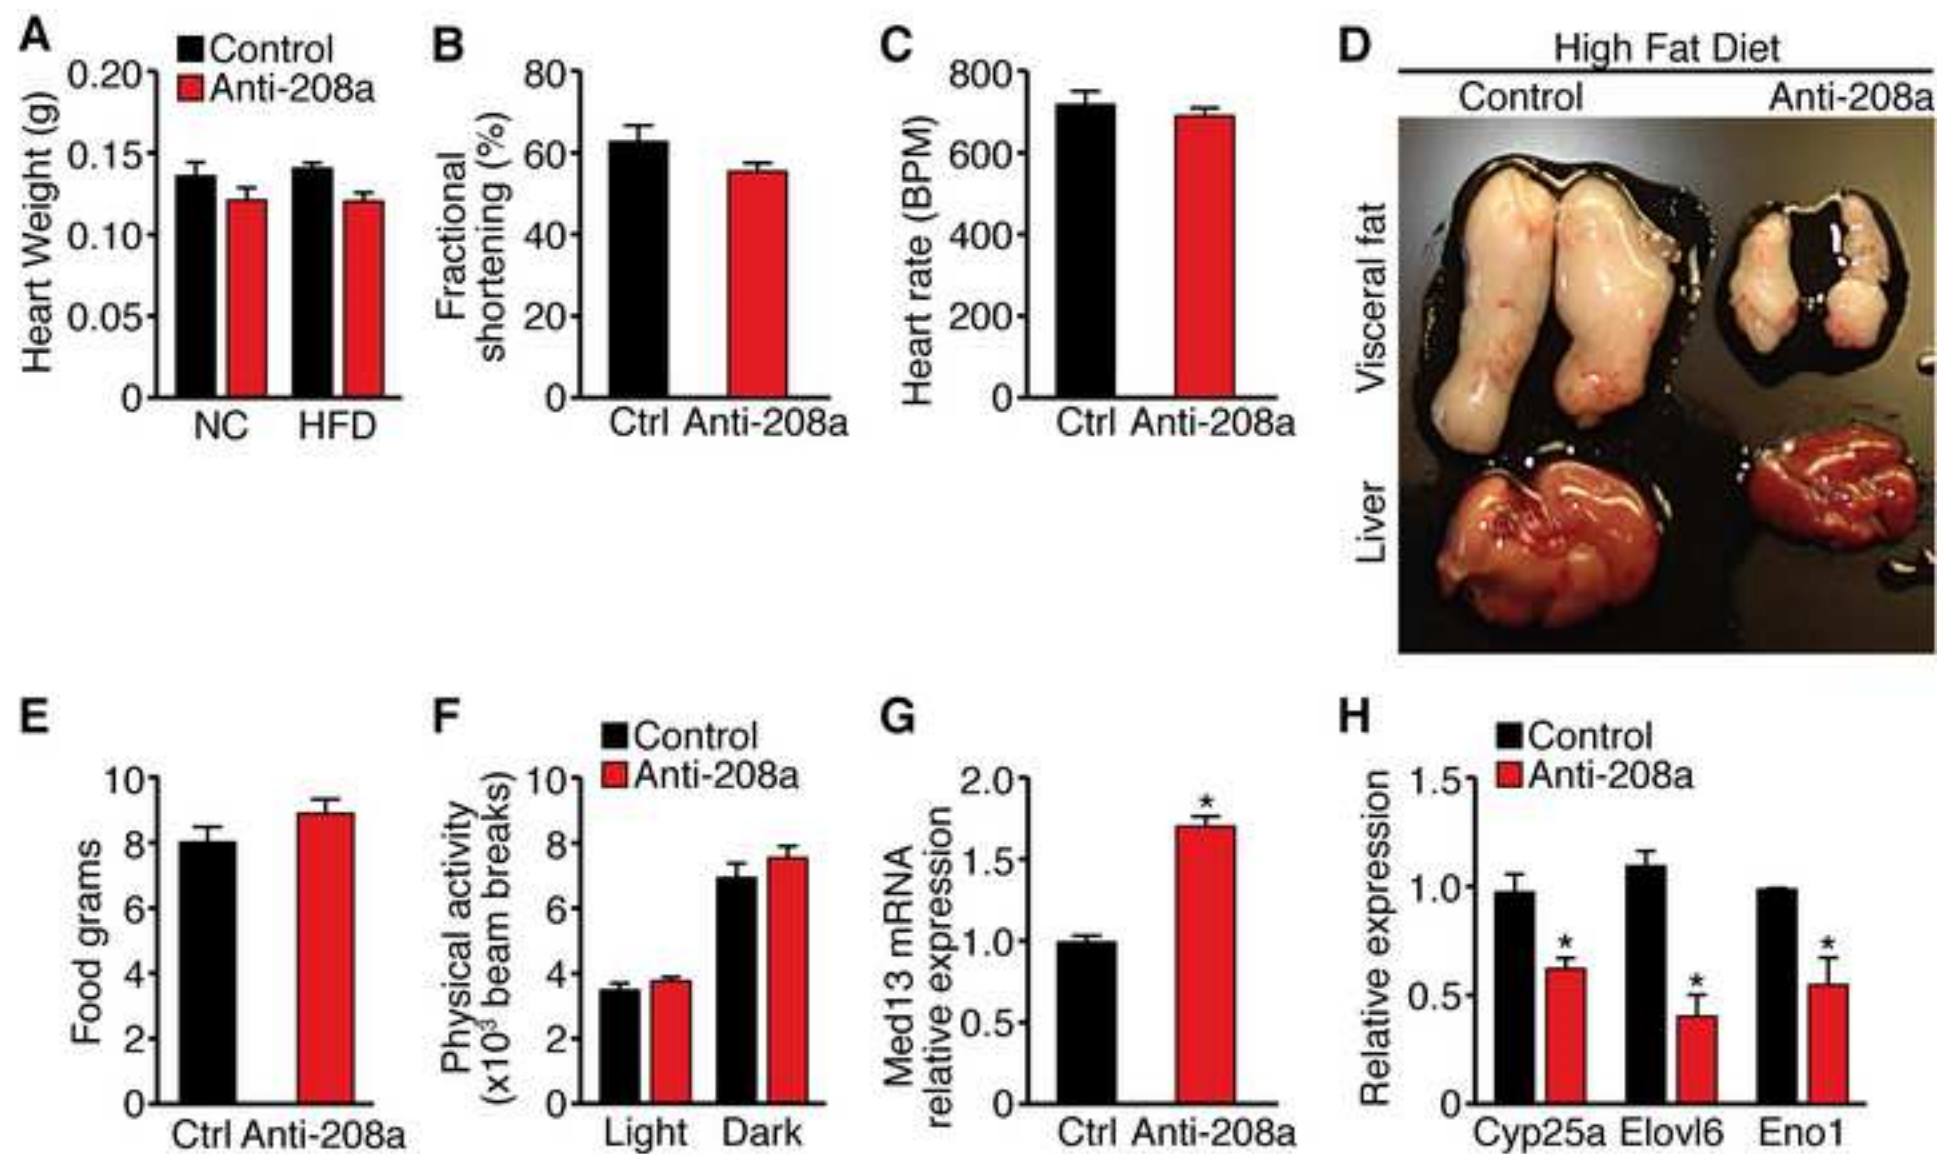

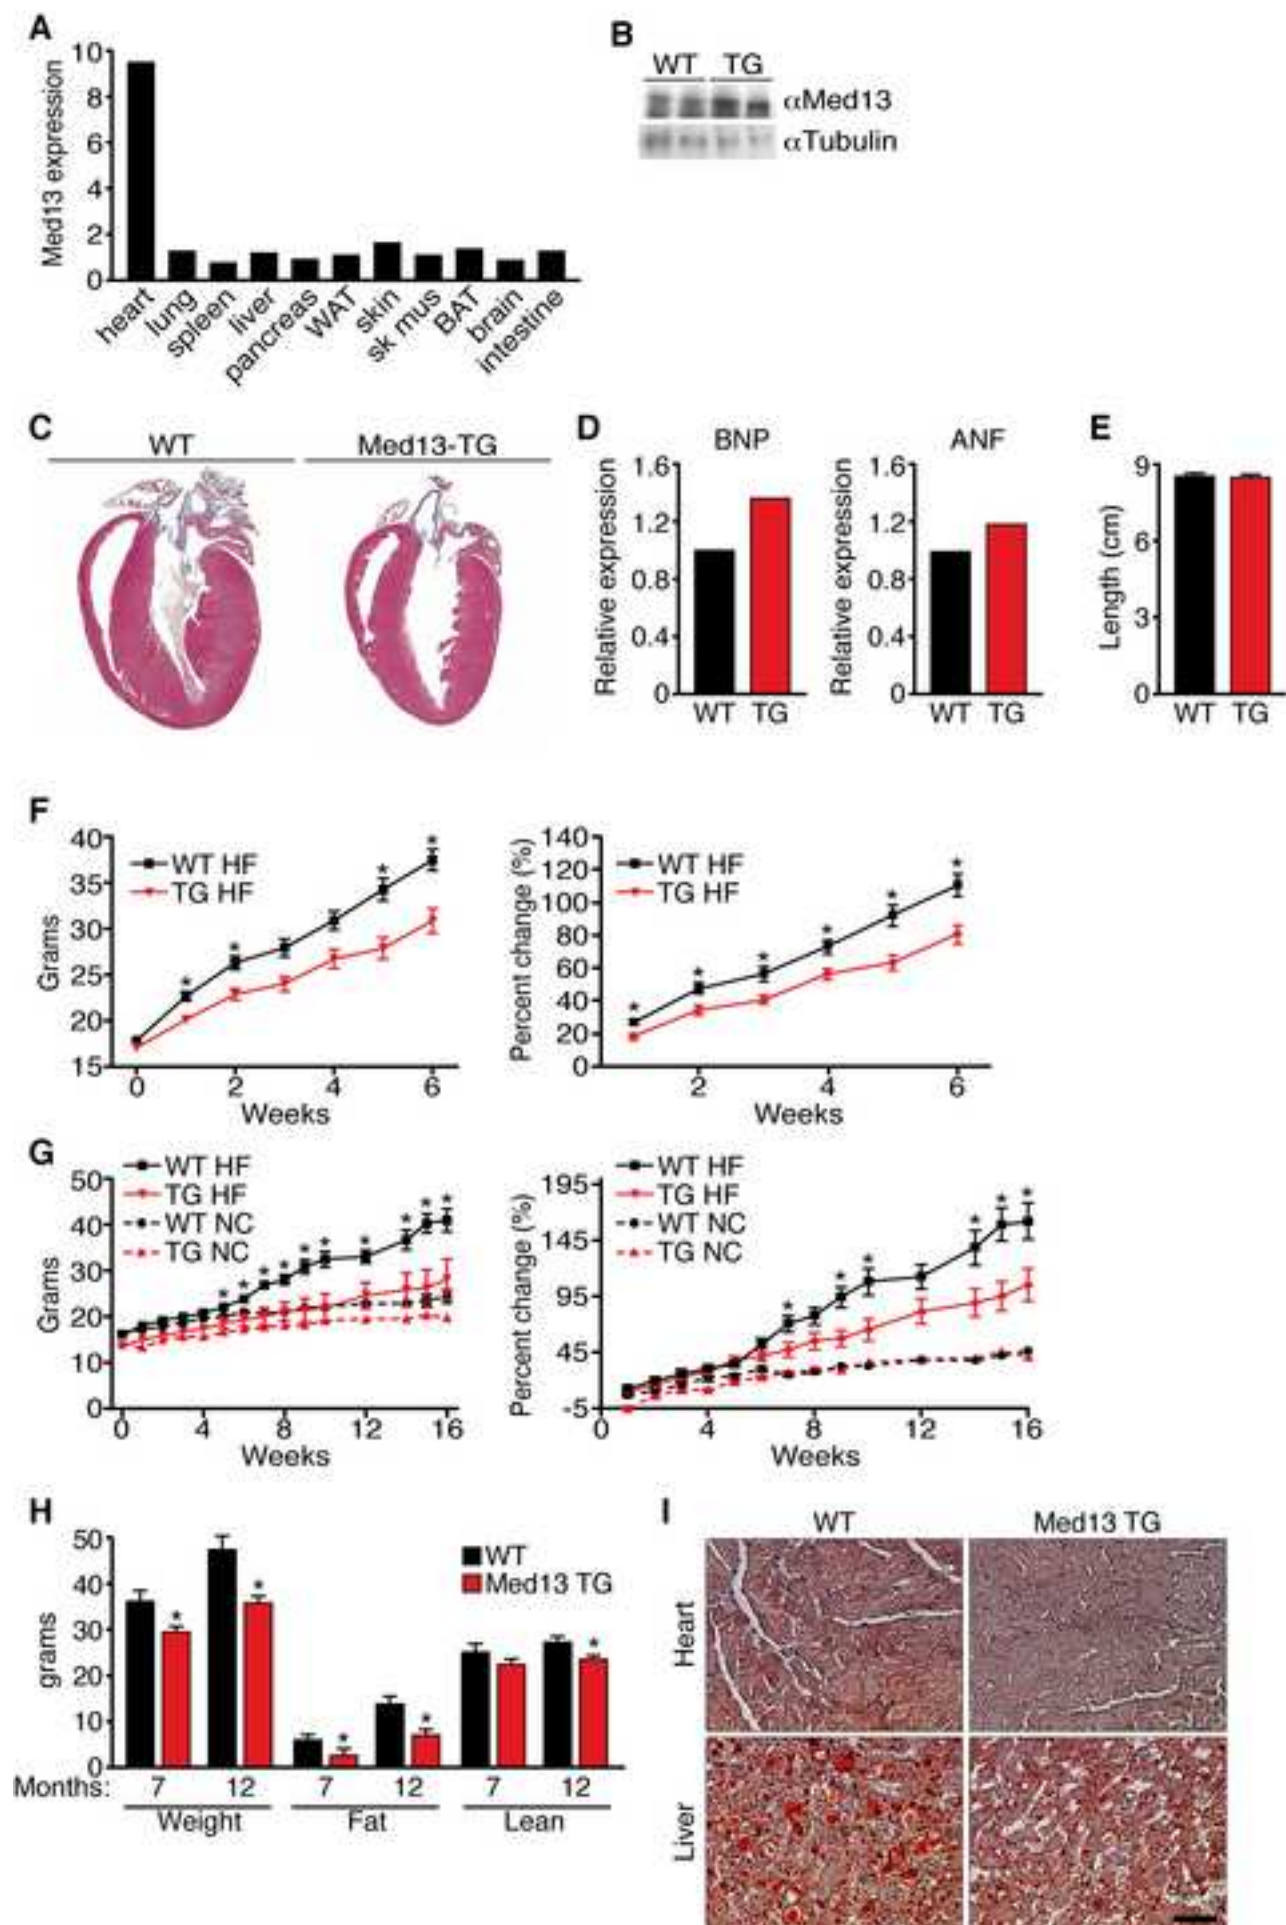

Supplemental Figure 3

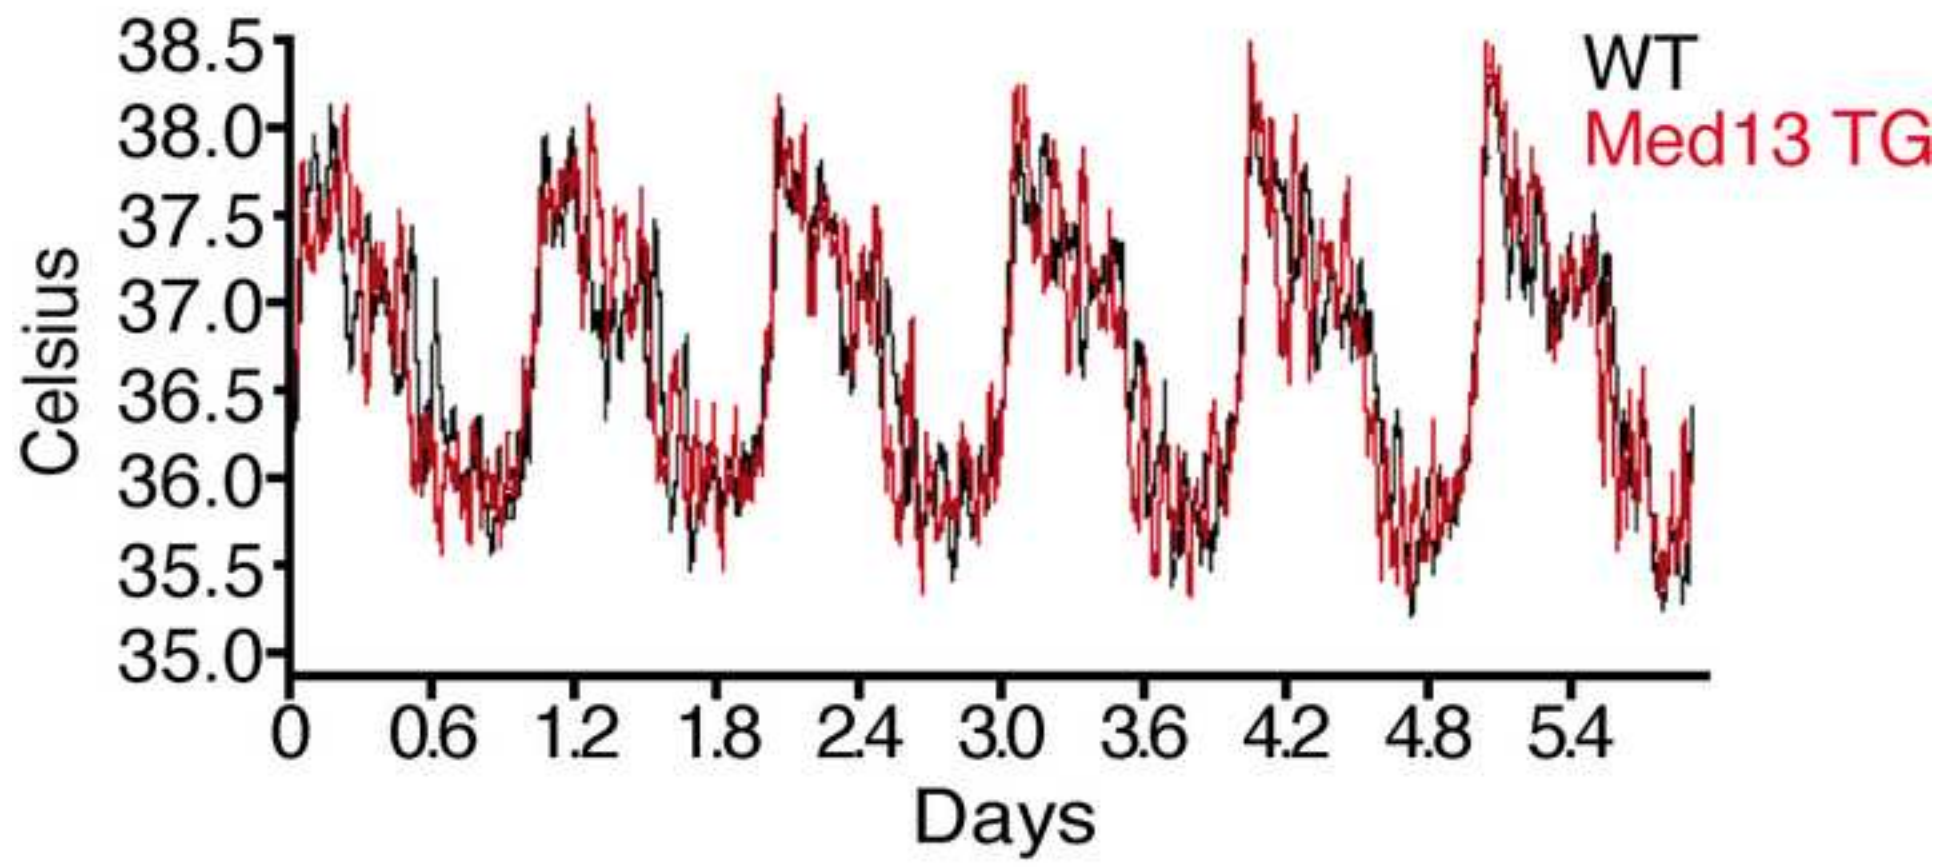

Supplemental Figure 4

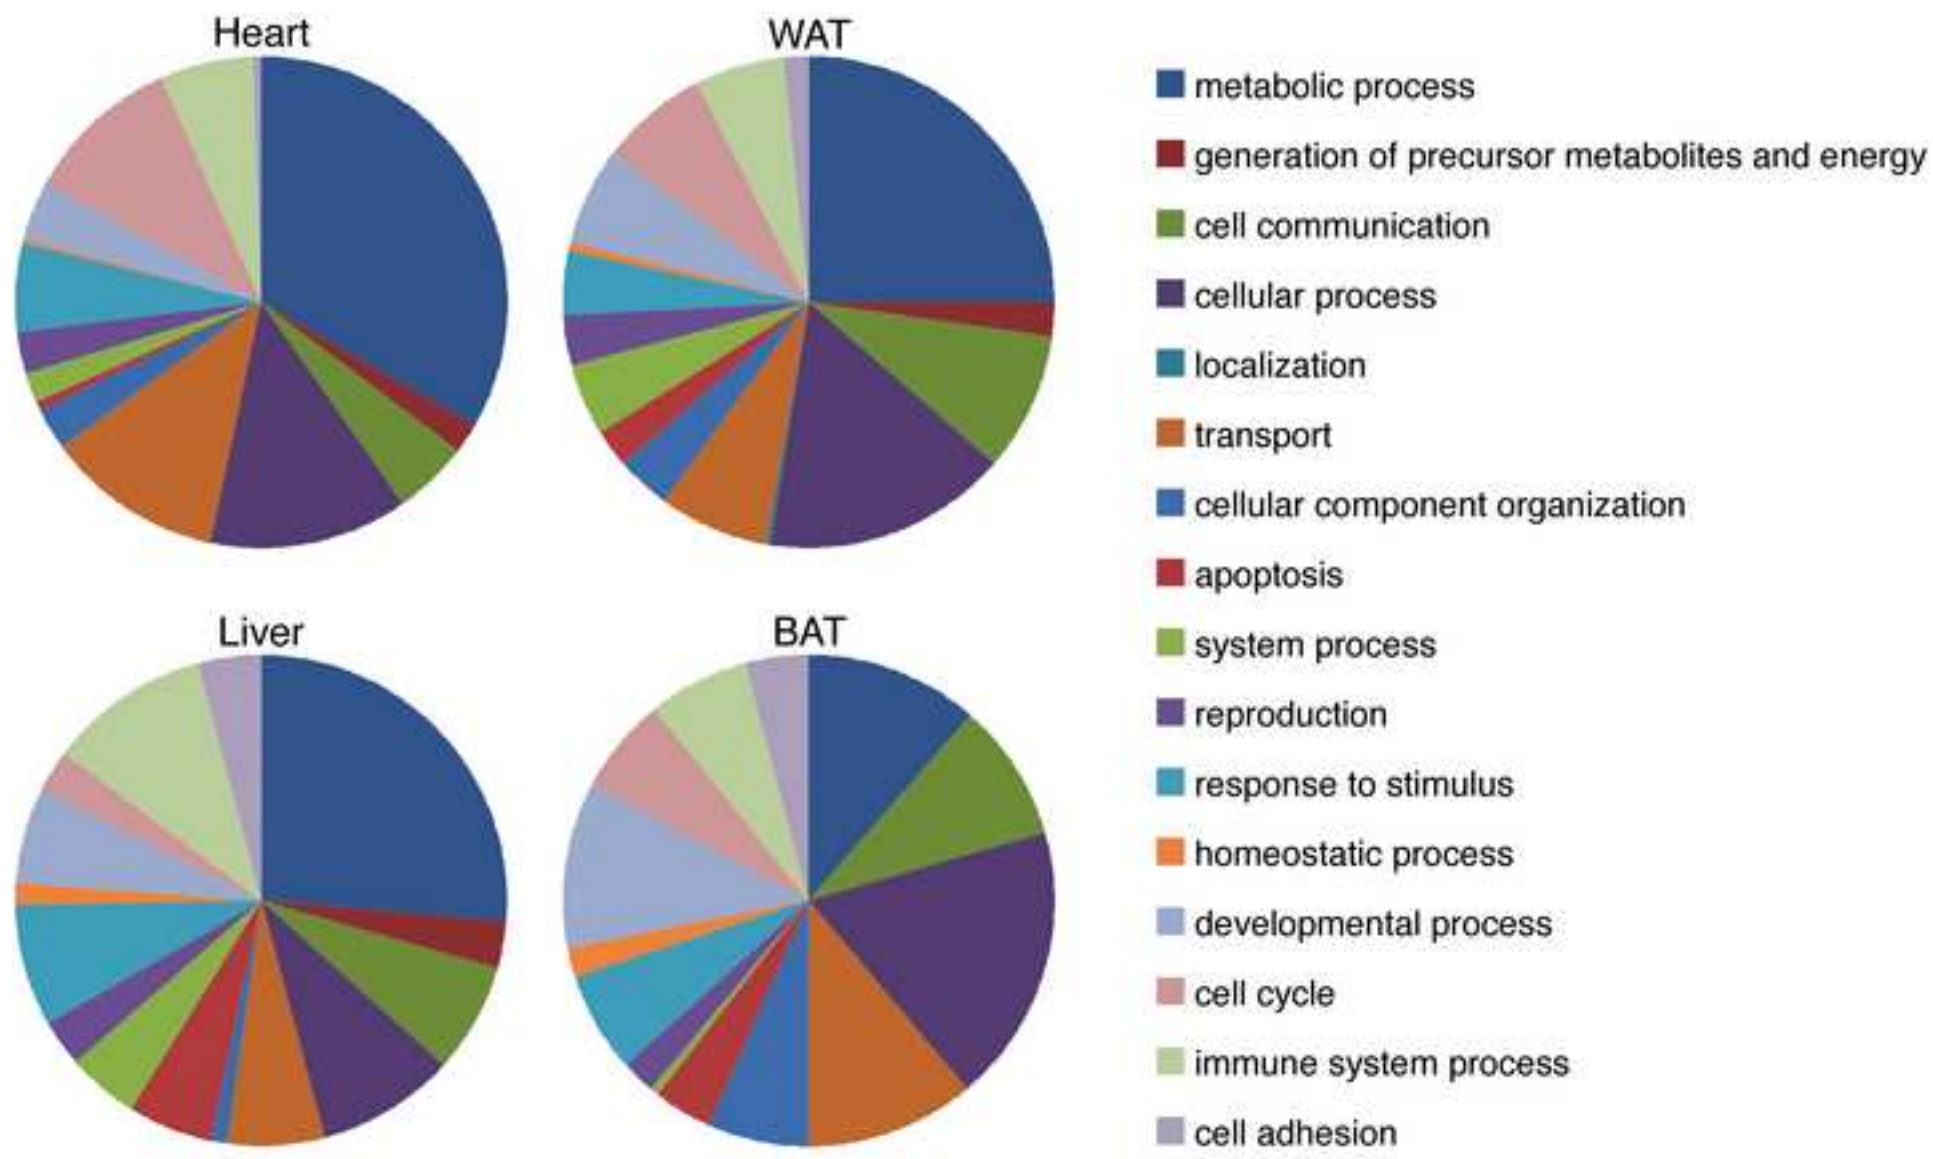

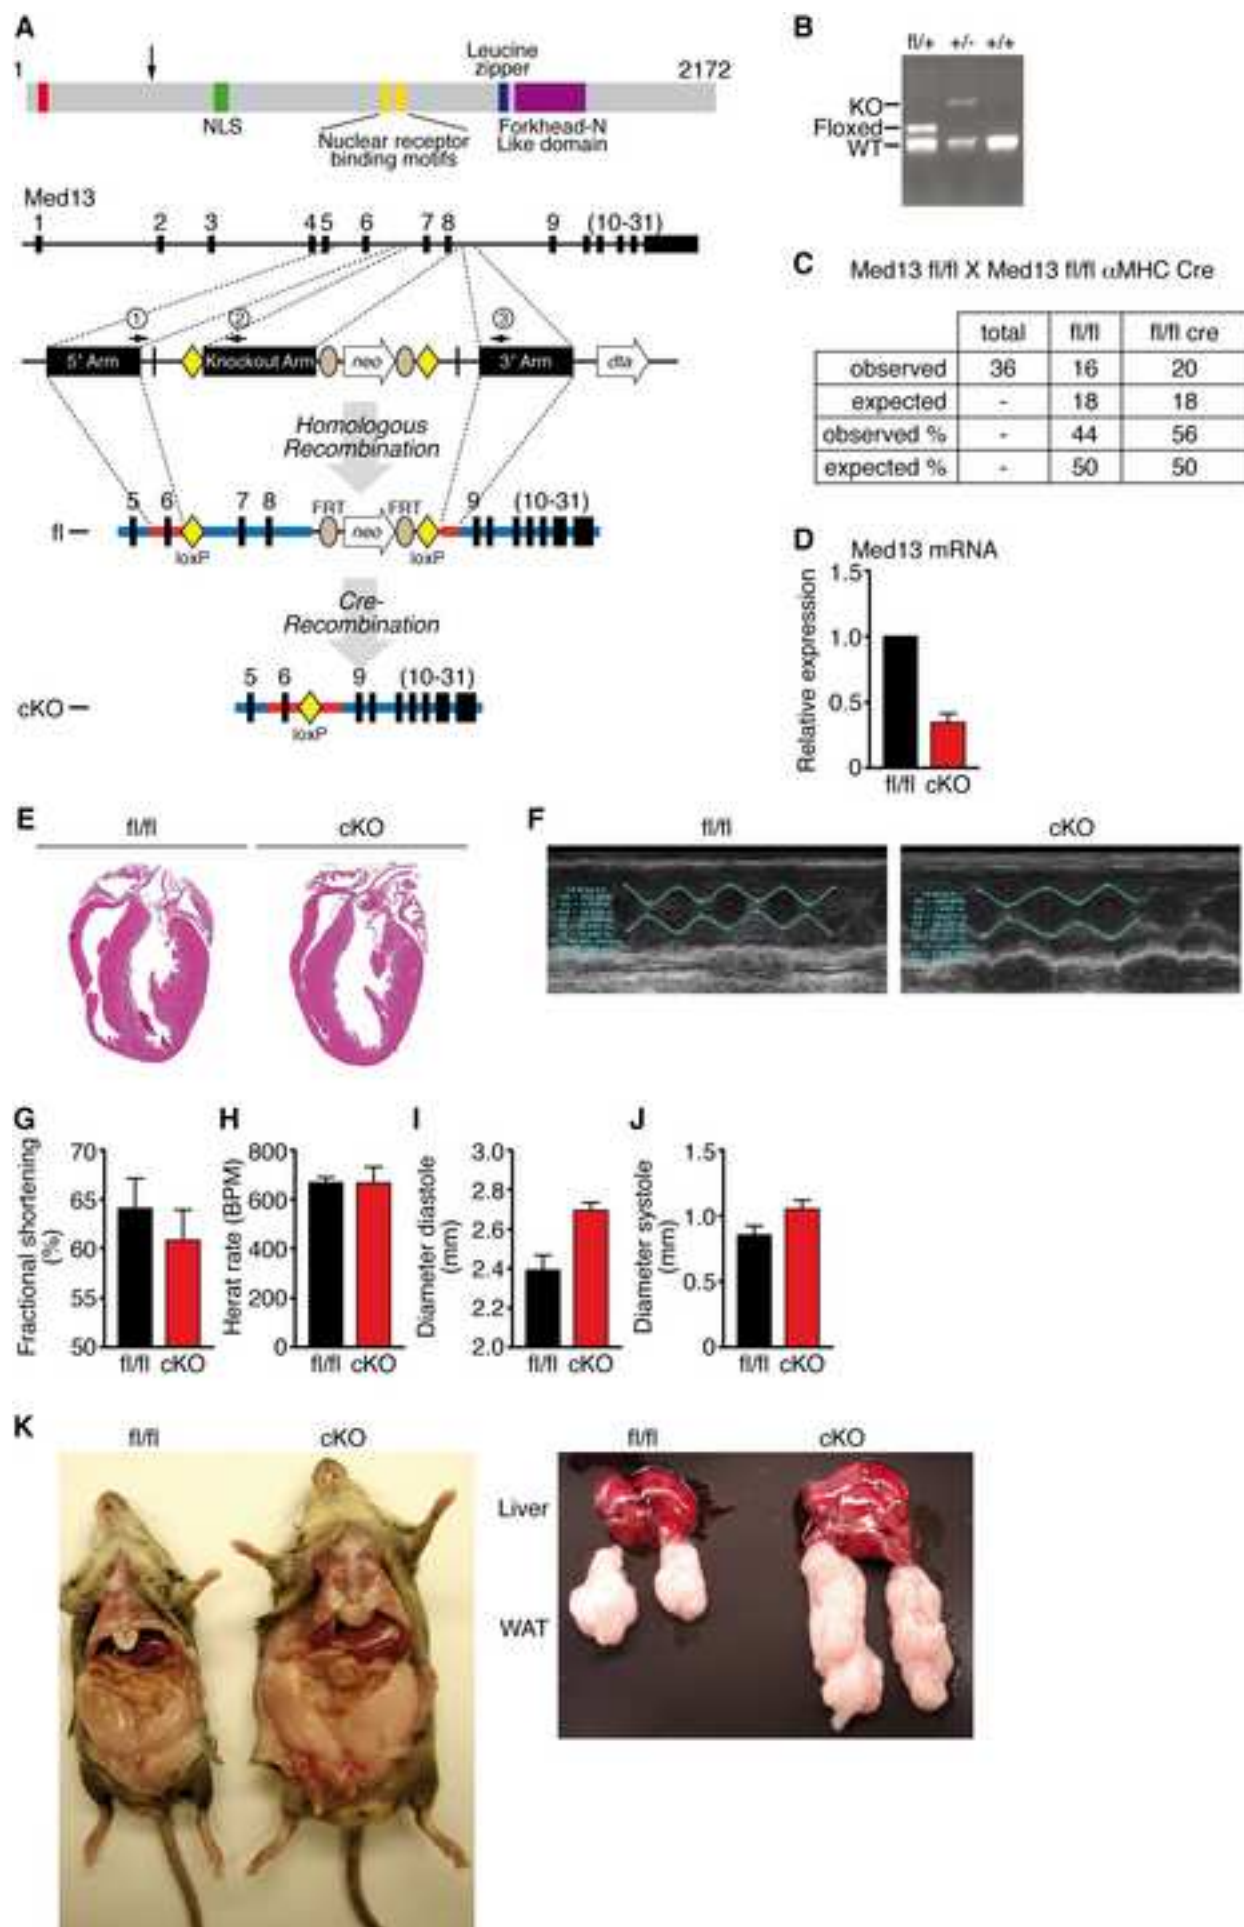

Supplement: NIHMS369079-supplement-02.pdf [file NIHMS369079-supplement-02.pdf]
